# Supplementary material
Source: HighWire-hosted journal article supplement (https://erj.ersjournals.com/content/56/3/2002510)
Supplement: inline-supplementary-material-1 [file inline-supplementary-material-1.pdf]

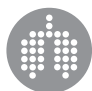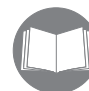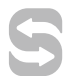

SHAREABLE PDF

# Intermittent regimens for tuberculosis treatment: Back to the Future?

Jan-Willem C. Alffenaar<sup>1,2,3</sup>, Simon Tiberi<sup>4</sup>, Daniela M. Cirillo <sup>5</sup> and Giovanni Battista Migliori <sup>6,7</sup>

**Affiliations:** <sup>1</sup>Faculty of Medicine and Health, School of Pharmacy, University of Sydney, Sydney, Australia. <sup>2</sup>Westmead Hospital, Sydney, Australia. <sup>3</sup>Marie Bashir Institute for Infectious Diseases and Biosecurity, University of Sydney, Sydney, Australia. <sup>4</sup>Dept of Infection, Royal London Hospital, Barts Health NHS Trust, London, UK. <sup>5</sup>Emerging Bacterial Pathogens Unit, IRCCS San Raffaele Scientific Institute, Milan, Italy. <sup>6</sup>Servizio di Epidemiologia Clinica delle Malattie Respiratorie, Istituti Clinici Scientifici Maugeri IRCCS, Tradate, Italy. <sup>7</sup>Blizard Institute, Queen Mary University of London, London, UK.

**Correspondence:** Jan-Willem C. Alffenaar, University of Sydney, Faculty of Medicine and Health, School of Pharmacy, Science Road, Sydney, New South Wales 2006, Australia. E-mail: johannes.alffenaar@sydney.edu.au

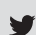

@ERSpublications

Once weekly bedaquiline, rifapentine and pyrazinamide has sterilising activity and is ready for further exploration in a clinical trial, including appropriate safety and pharmacokinetic assessment <https://bit.ly/3ivrY4m>

**Cite this article as:** Alffenaar J-WC, Tiberi S, Cirillo DM, *et al.* Intermittent regimens for tuberculosis treatment: Back to the Future? *Eur Respir J* 2020; 56: 2002510 [<https://doi.org/10.1183/13993003.02510-2020>].

This single-page version can be shared freely online.

Despite all efforts to accelerate the response against tuberculosis (TB), many countries are struggling to achieve the milestones of the End TB strategy [1]. The investment required in a strong healthcare system to combat TB is significant. Lack of a short and highly active sterilising TB treatment regimen is the main reason for treatment failure and emergence of drug resistance [2]. With increasing drug resistance, the treatment becomes longer and more difficult to manage due to use of more toxic and less active drugs. Although treatment management is focused on prevention of adverse drug reactions, most patients will experience drug toxicity during treatment [3] which can result in nonadherence.
